# Supplementary material for: The replicative lifespan‐extending deletion of SGF73 results in altered ribosomal gene expression in yeast
Source: PubMed Central journal article supplement (PMC5506417; doi:10.1111/acel.12611), 2017-05-31

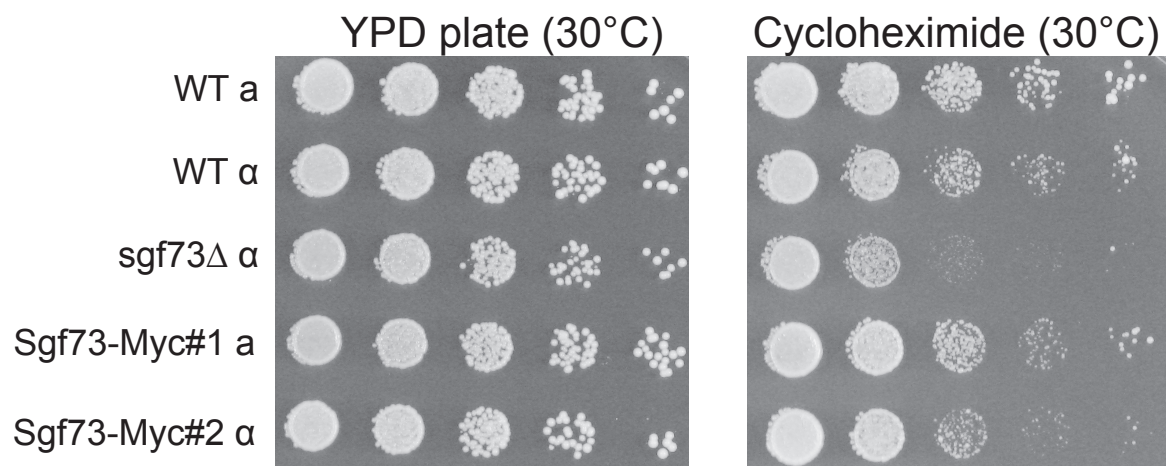

Supplement: ACEL-16-785-s002.pdf [file ACEL-16-785-s002.pdf]
